# Supplementary material for: Agave angustifolia Haw. Leaves as a Potential Source of Bioactive Compounds: Extraction Optimization and Extract Characterization
Source: MDPI journal article supplement (doi:10.3390/molecules29051137), 2024-03-03
Supplement: s1 [file s1]

**Supplementary Table S1.** Analysis of variance and model fitting of phenolic and flavonoid content evaluated in the maceration extraction.

| Phenolic content         |                        |         |         | Flavonoid content        |                        |         |         | Total extraction yield   |                        |         |         |
|--------------------------|------------------------|---------|---------|--------------------------|------------------------|---------|---------|--------------------------|------------------------|---------|---------|
| Statistical data         | Regression coefficient | F-value | p-value | Statistical data         | Regression coefficient | F-value | p-value | Statistical data         | Regression coefficient | F-value | p-value |
| Model                    | -                      | 201.19  | <0.0001 | Model                    | -                      | 35.47   | <0.0001 | Model                    |                        | 24.19   | <0.0001 |
| Linear mixture           | -                      | 516.05  | <0.0001 | Linear Mixture           | -                      | 73.42   | <0.0001 | Linear Mixture           |                        | 44.12   | <0.0001 |
| *A                       | -0.1802                |         | <       | A                        | -0.1640                |         |         | A                        | +3.01                  |         |         |
| *B                       | +1.44                  |         |         | B                        | +0.5832                |         |         | B                        | +2.51                  |         |         |
| *C                       | +2.82                  |         |         | C                        | +1.04                  |         |         | C                        | +3.13                  |         |         |
| AB                       | +2.36                  | 34.57   | <0.0001 | AB                       | +0.5024                | 1.10    | 0.3065  | AB                       | -2.01                  | 17.95   | 0.0004  |
| AC                       | +7.88                  | 386.90  | <0.0001 | AC                       | +4.51                  | 88.53   | <0.0001 | AC                       | +1.83                  | 14.91   | 0.0009  |
| BC                       | +3.91                  | 95.20   | <0.0001 | BC                       | +1.98                  | 17.12   | 0.0005  | BC                       | +2.08                  | 19.15   | 0.0003  |
| ABC                      | -4.38                  | 2.78    | 0.1104  | ABC                      | -0.0645                | 0.0004  | 0.9838  | ABC                      | +5.11                  | 2.69    | 0.1156  |
| AB(A-B)                  | -3.78                  | 8.08    | 0.0098  | AB(A-B)                  | -6.16                  | 14.98   | 0.0009  | AB(A-B)                  | -5.14                  | 10.63   | 0.0037  |
| AC(A-C)                  | +5.96                  | 20.06   | 0.0002  | AC(A-C)                  | +3.13                  | 3.87    | 0.0625  | AC(A-C)                  | -2.89                  | 3.36    | 0.0809  |
| Lack of fit              |                        |         | 0.3733  | Lack of fit              |                        |         | 0.8612  | Lack of fit              |                        |         | 0.2241  |
| **R <sup>2</sup>         | 0.9871                 |         |         | R <sup>2</sup>           | 0.9311                 |         |         | R <sup>2</sup>           | 0.9021                 |         |         |
| ***Adj R <sup>2</sup>    | 0.9822                 |         |         | Adj R <sup>2</sup>       | 0.9048                 |         |         | Adj R <sup>2</sup>       | 0.8648                 |         |         |
| Predicted R <sup>2</sup> | 0.9741                 |         |         | Predicted R <sup>2</sup> | 0.8619                 |         |         | Predicted R <sup>2</sup> | 0.8237                 |         |         |
| Adequate precision       | 44.63                  |         |         | Adequate precision       | 18.62                  |         |         | Adequate precision       | 15.01                  |         |         |

\*The letters A, B, and C indicated the individual solvents acetone, ethanol and water, respectively. The combination of these letters represents the mixture of the solvent system.

\*\*R<sup>2</sup>: Coefficient of determination.

\*\*\*Adj R<sup>2</sup>: Adjusted coefficient of determination.

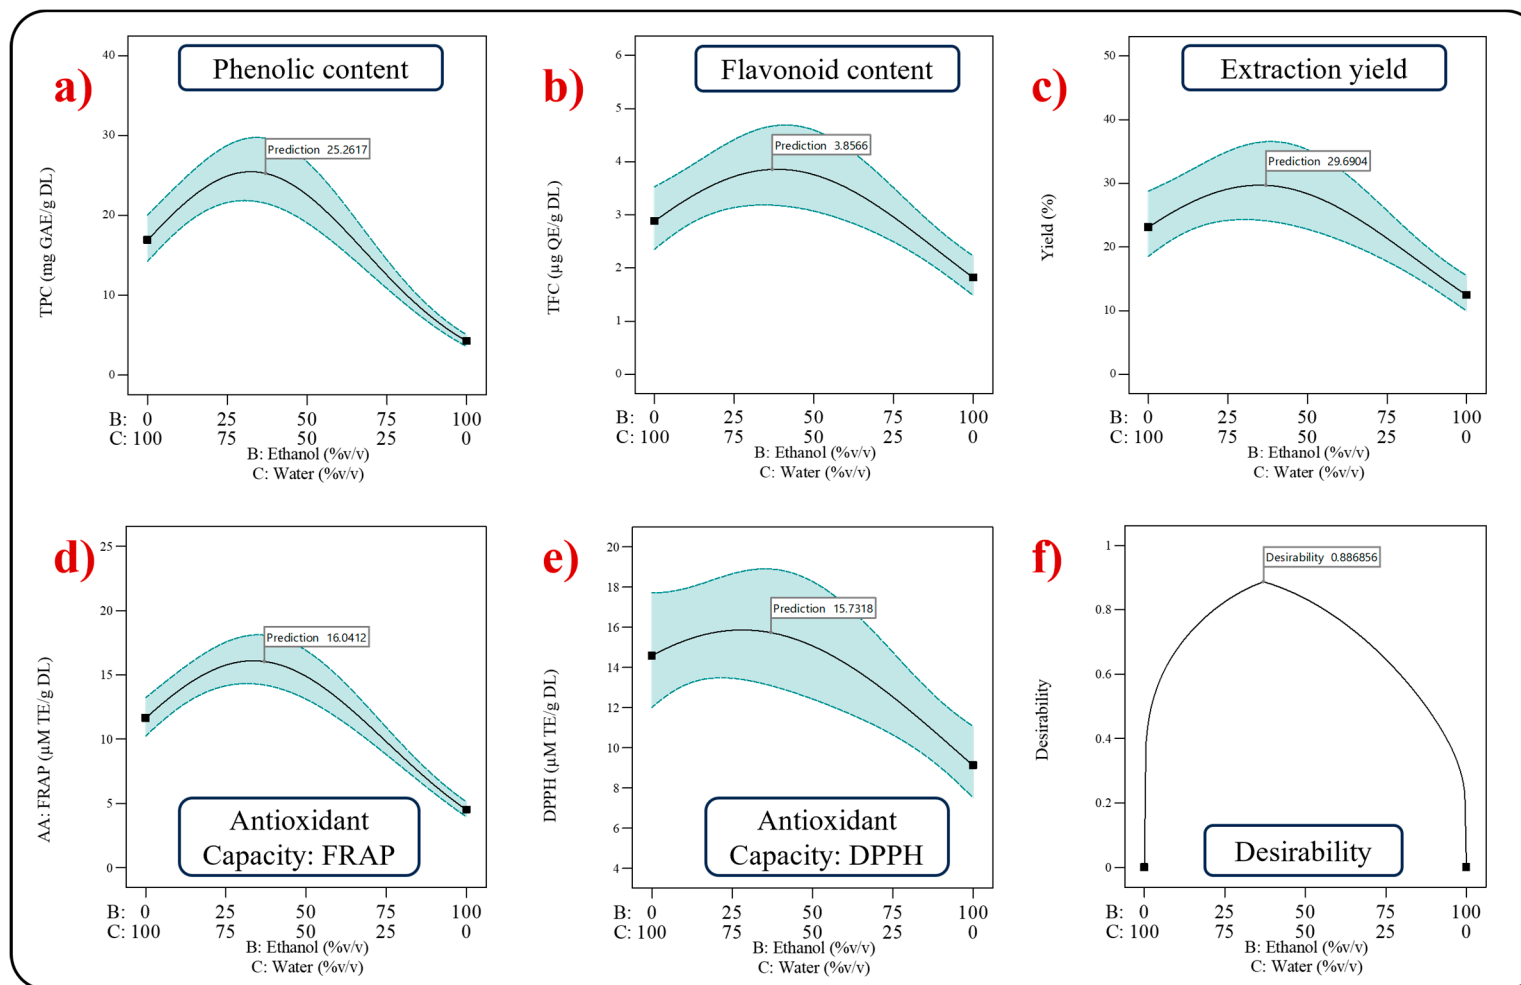

**Figure S1.** Desirability function and predicted values of the reduced cubic model in the maceration extraction process a) phenolic content, b) flavonoid content, c) extraction yield, d) antioxidant capacity FRAP, e) antioxidant capacity DPPH, f) desirability function of the model.

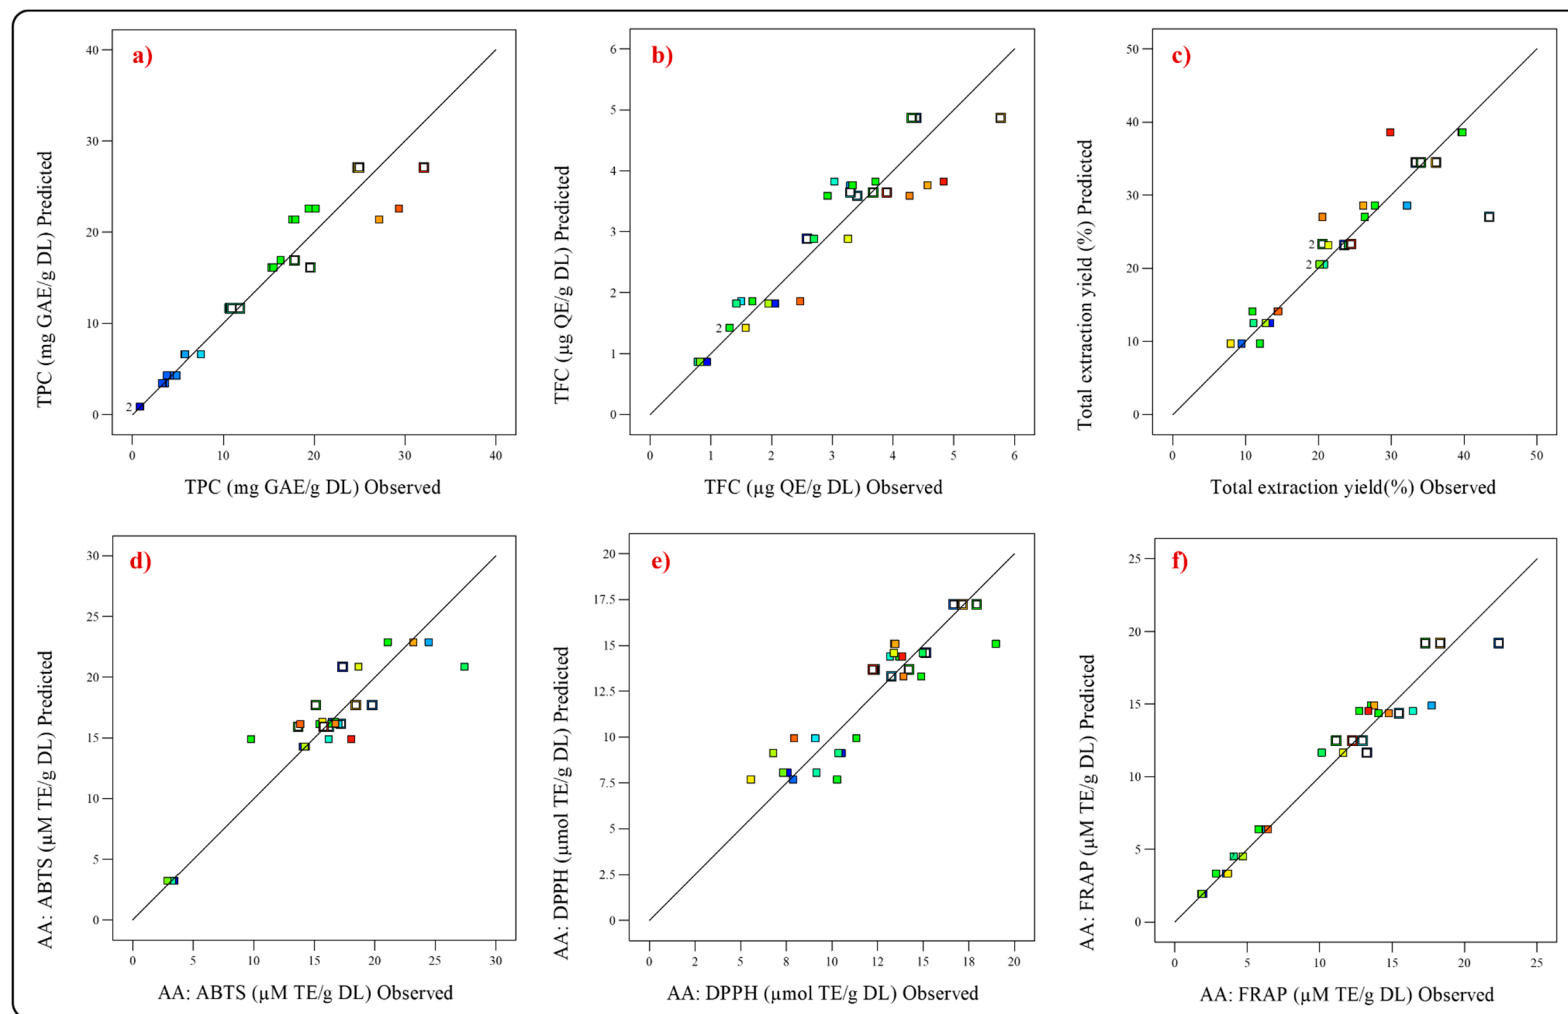

**Figure S2.** Correlation between the predicted responses by the reduced cubic model in the optimization of the maceration process using a simplex-centroid design vs. the observed values of each response variable a) phenolic content, b) flavonoid content, c) extraction yield, antioxidant capacity: ABTS (d); DPPH (e) and FRAP (f).

**Supplementary Table S2.** Analysis of variance and model fitting of the antioxidant activity evaluated by using the ABTS<sup>•+</sup>, DPPH<sup>•+</sup>, and FRAP assays in the maceration extraction.

| <b>**AA: ABTS</b>        |                        |         |         | <b>AA: DPPH</b>                |                        |         |         | <b>AA: FRAP</b>                |                        |         |         |
|--------------------------|------------------------|---------|---------|--------------------------------|------------------------|---------|---------|--------------------------------|------------------------|---------|---------|
| Statistical data         | Regression coefficient | F-value | p-value | Statistical data               | Regression coefficient | F-value | p-value | Statistical data               | Regression coefficient | F-value | p-value |
| Model                    | -                      | 46.05   | <0.0001 | Model                          |                        | 10.74   | <0.0001 | Model                          |                        | 176.01  | <0.0001 |
| Linear mixture           | -                      | 102.51  | <0.0001 | Linear Mixture                 |                        | 26.75   | <0.0001 | Linear Mixture                 |                        | 394.89  | <0.0001 |
| *A                       | +1.15                  |         |         | A                              | +2.07                  |         |         | A                              | +0.6463                |         |         |
| *B                       | +2.65                  |         |         | B                              | +2.20                  |         |         | B                              | +1.50                  |         |         |
| *C                       | +3.03                  |         |         | C                              | +2.67                  |         |         | C                              | +2.45                  |         |         |
| AB                       | +3.51                  | 70.40   | <0.0001 | AB                             | -0.4398                | 0.9219  | 0.3479  | AB                             | +0.4959                | 2.70    | 0.1152  |
| AC                       | +3.09                  | 54.32   | <0.0001 | AC                             | +1.86                  | 16.47   | 0.0006  | AC                             | +5.60                  | 344.79  | <0.0001 |
| BC                       | +1.13                  | 7.28    | 0.0135  | BC                             | +1.07                  | 5.47    | 0.0293  | BC                             | +2.88                  | 91.40   | <0.0001 |
| ABC                      | -9.84                  | 12.84   | 0.0018  | ABC                            | -0.3571                | 0.0141  | 0.9065  | ABC                            | +3.48                  | 3.08    | 0.0937  |
| AB(A-B)                  | +2.26                  | 2.64    | 0.1192  | AB(A-B)                        | -4.20                  | 7.62    | 0.0117  | AB(A-B)                        | -7.32                  | 53.35   | <0.0001 |
| AC(A-C)                  | +6.23                  | 20.04   | 0.0002  | AC(A-C)                        | +2.57                  | 2.85    | 0.1059  | AC(A-C)                        | +6.14                  | 37.57   | <0.0001 |
| Lack of fit              |                        |         | 0.9262  | Lack of fit                    |                        |         | 0.2734  | Lack of fit                    |                        |         | 0.3827  |
| ***R <sup>2</sup>        | 0.9461                 |         |         | R <sup>2</sup>                 | 0.8035                 |         |         | R <sup>2</sup>                 | 0.9853                 |         |         |
| ****Adj R <sup>2</sup>   | 0.9255                 |         |         | Adj R <sup>2</sup>             | 0.7287                 |         |         | Adj R <sup>2</sup>             | 0.9797                 |         |         |
| Predicted R <sup>2</sup> | 0.8906                 |         |         | <b>Predicted R<sup>2</sup></b> | 0.5798                 |         |         | <b>Predicted R<sup>2</sup></b> | 0.9689                 |         |         |
| Adequate precision       | 24.19                  |         |         | Adequate precision             | 9.11                   |         |         | Adequate precision             | 39.32                  |         |         |

\*The letters A, B, and C indicated the individual solvents acetone, ethanol, and water, respectively. The combination of these letters represents the mixture of the solvent system.

\*\*AA: Antioxidant activity.

\*\*\*R<sup>2</sup>: Coefficient of determination.

\*\*\*\*Adj R<sup>2</sup>: Adjusted coefficient of determination.

**Supplementary Table S3.** *Analysis of variance and model fitting of phenolic and flavonoid content evaluated in the scCO<sub>2</sub> extraction.*

| Phenolic content         |                        |         |         | Flavonoid content        |                        |         |         |
|--------------------------|------------------------|---------|---------|--------------------------|------------------------|---------|---------|
| Statistical data         | Regression coefficient | F-value | p-value | Statistical data         | Regression coefficient | F-value | p-value |
| Model                    | +22.21                 | 39.87   | <0.0001 | Model                    | +19.97                 | 39.98   | <0.0001 |
| A: Temperature           | +4.22                  | 10.17   | 0.0031  | A: Temperature           | +8.03                  | 49.32   | <0.0001 |
| B: Pressure              | +6.95                  | 27.65   | <0.0001 | B: Pressure              | +6.45                  | 31.87   | <0.0001 |
| C: Modifier              | +19.51                 | 222.08  | <0.0001 | C: Modifier              | +16.01                 | 200.04  | <0.0001 |
| *AB                      | +0.9770                | 0.2785  | 0.6012  | AB                       | -1.19                  | 0.5513  | 0.4631  |
| *AC                      | +5.88                  | 10.28   | 0.0030  | AC                       | +5.13                  | 10.48   | 0.0028  |
| *BC                      | +7.50                  | 16.72   | 0.0003  | BC                       | +7.77                  | 24.03   | <0.0001 |
| A <sup>2</sup>           | -2.03                  | 1.11    | 0.3005  | A <sup>2</sup>           | -3.55                  | 4.53    | 0.0408  |
| B <sup>2</sup>           | +10.23                 | 28.16   | <0.0001 | B <sup>2</sup>           | +6.54                  | 15.38   | 0.0004  |
| C <sup>2</sup>           | -6.45                  | 10.15   | 0.0032  | C <sup>2</sup>           | -0.5631                | 0.1033  | 0.7499  |
| Lack of fit              |                        |         | 0.6740  | Lack of fit              |                        |         | 0.1338  |
| **R <sup>2</sup>         | 0.9158                 |         |         | R <sup>2</sup>           | 0.9160                 |         |         |
| Predicted R <sup>2</sup> | 0.8425                 |         |         | Predicted R <sup>2</sup> | 0.8411                 |         |         |
| ***Adj R <sup>2</sup>    | 0.8928                 |         |         | Adj R <sup>2</sup>       | 0.8931                 |         |         |
| Adequate precision       | 20.48                  |         |         | Adequate precision       | 20.86                  |         |         |

\*The combination of these letters represents the interaction between the independent variables evaluated in the experimental design.

\*\*R<sup>2</sup>: Coefficient of determination.

\*\*\*Adj R<sup>2</sup>: Adjusted coefficient of determination.

**Supplementary Table S4.** Analysis of variance and model fitting of the antioxidant activity evaluated by using the ABTS<sup>•+</sup>, DPPH<sup>•+</sup>, and FRAP assays in the scCO<sub>2</sub> extraction.

| <b>**AA: ABTS</b>        |                        |         |         | <b>AA: DPPH</b>          |                        |         |         | <b>AA: FRAP</b>          |                        |         |         |
|--------------------------|------------------------|---------|---------|--------------------------|------------------------|---------|---------|--------------------------|------------------------|---------|---------|
| Statistical data         | Regression coefficient | F-value | p-value | Statistical data         | Regression coefficient | F-value | p-value | Statistical data         | Regression coefficient | F-value | p-value |
| Model                    | +197.15                | 33.26   | <0.0001 | Model                    | +30.91                 | 87.02   | <0.0001 | Model                    | +15.39                 | 63.28   | <0.0001 |
| A: Temperature           | +51.15                 | 34.55   | <0.0001 | A: Temperature           | +7.85                  | 68.75   | <0.0001 | A: Temperature           | +1.95                  | 7.66    | 0.0092  |
| B: Pressure              | +29.64                 | 5.91    | 0.0208  | B: Pressure              | +6.87                  | 52.65   | <0.0001 | B: Pressure              | +4.83                  | 47.13   | <0.0001 |
| C: Modifier              | +94.46                 | 120.16  | <0.0001 | C: Modifier              | +20.46                 | 476.53  | <0.0001 | C: Modifier              | +14.48                 | 432.63  | <0.0001 |
| *AB                      | -39.76                 | 10.65   | 0.0026  | AB                       | +1.34                  | 1.02    | 0.3190  | AB                       | -0.1710                | 0.0302  | 0.8632  |
| *AC                      | +41.92                 | 12.07   | 0.0015  | AC                       | +5.26                  | 16.09   | 0.0003  | AC                       | +2.44                  | 6.26    | 0.0175  |
| *BC                      | +28.18                 | 5.35    | 0.0273  | BC                       | +5.99                  | 20.84   | <0.0001 | BC                       | +5.39                  | 30.63   | <0.0001 |
| A <sup>2</sup>           | -34.67                 | 7.47    | 0.0101  | A <sup>2</sup>           | -2.76                  | 4.02    | 0.0533  | A <sup>2</sup>           | -1.44                  | 1.96    | 0.1705  |
| B <sup>2</sup>           | +55.47                 | 19.13   | 0.0001  | B <sup>2</sup>           | +7.77                  | 31.76   | <0.0001 | B <sup>2</sup>           | +3.16                  | 9.51    | 0.0041  |
| C <sup>2</sup>           | -111.33                | 69.71   | <0.0001 | C <sup>2</sup>           | -8.75                  | 36.37   | <0.0001 | C <sup>2</sup>           | -1.42                  | 1.74    | 0.1960  |
| A <sup>2</sup> B         | -67.18                 | 14.90   | 0.0005  | -                        | -                      | -       | -       | -                        | -                      | -       | -       |
| Lack of fit              |                        |         | 0.0981  | Lack of fit              |                        |         | 0.5328  | Lack of fit              |                        |         | 0.9225  |
| ***R <sup>2</sup>        | 0.9122                 |         |         | R <sup>2</sup>           | 0.9596                 |         |         | R <sup>2</sup>           | 0.9452                 |         |         |
| Predicted R <sup>2</sup> | 0.8173                 |         |         | Predicted R <sup>2</sup> | 0.9234                 |         |         | Predicted R <sup>2</sup> | 0.9053                 |         |         |
| ****Adj R <sup>2</sup>   | 0.8848                 |         |         | Adj R <sup>2</sup>       | 0.9485                 |         |         | Adj R <sup>2</sup>       | 0.9303                 |         |         |
| Adequate precision       | 18.71                  |         |         | Adequate precision       | 28.55                  |         |         | Adequate precision       | 25.46                  |         |         |

\*The combination of these letters represents the interaction between the independent variables evaluated in the experimental design.

\*\*AA: Antioxidant activity.

\*\*\*R<sup>2</sup>: Coefficient of determination.

\*\*\*\*Adj R<sup>2</sup>: Adjusted coefficient of determination.
